# Supplementary material for: Effect of Post-Ruminal Urea Supply on Growth Performance of Grazing Nellore Young Bulls at Dry Season
Source: MDPI journal article supplement (doi:10.3390/ani13020207), 2023-01-06
Supplement: s1 [file s1]

**Table S1.** Median and interquartile range of the relative abundance of the genera in Nellore steers influenced by the use of post-ruminal urea in relation to conventional urea during the dry season.

| Domain   | Phylum           | Genera                                 | Treatments                  |                             |                             | P-value |
|----------|------------------|----------------------------------------|-----------------------------|-----------------------------|-----------------------------|---------|
|          |                  |                                        | CONT                        | PRU                         | U+PRU                       |         |
| Bacteria | Actinobacteriota | <i>Actinomycetospora</i>               | NI <sup>b</sup>             | 0.000 ± 0.005 <sup>ab</sup> | 0.001 ± 0.013 <sup>a</sup>  | 0.030   |
|          |                  | <i>DNF00809</i>                        | 0.065 ± 0.017 <sup>b</sup>  | 0.089 ± 0.031 <sup>a</sup>  | 0.068 ± 0.390 <sup>ab</sup> | 0.051   |
|          |                  | <i>Ilumatobacteraceae</i>              | 0.003 ± 0.012 <sup>ab</sup> | 0.012 ± 0.030 <sup>a</sup>  | NI <sup>b</sup>             | 0.035   |
|          |                  | <i>Jatrophihabitans</i>                | NI <sup>b</sup>             | 0.000 ± 0.013 <sup>ab</sup> | 0.000 ± 0.015 <sup>a</sup>  | 0.089   |
|          |                  | <i>Kineococcus</i>                     | NI <sup>b</sup>             | NI <sup>b</sup>             | 0.000 ± 0.001 <sup>a</sup>  | 0.039   |
|          |                  | <i>Kineosporia</i>                     | NI <sup>b</sup>             | 0.000 ± 0.044 <sup>ab</sup> | 0.048 ± 0.058 <sup>a</sup>  | 0.091   |
|          |                  | <i>Kribbella</i>                       | NI <sup>b</sup>             | 0.000 ± 0.008 <sup>a</sup>  | NI <sup>ab</sup>            | 0.060   |
|          |                  | <i>Uncultured</i>                      | NI <sup>b</sup>             | NI <sup>b</sup>             | 0.008 ± 0.012 <sup>a</sup>  | 0.003   |
|          | Bacteroidota     | <i>Uncultured</i>                      | 0.412 ± 0.191 <sup>a</sup>  | 0.296 ± 0.123 <sup>b</sup>  | 0.252 ± 0.108 <sup>b</sup>  | 0.013   |
|          |                  | <i>U29.B03</i>                         | 0.075 ± 0.045 <sup>a</sup>  | 0.033 ± 0.015 <sup>b</sup>  | 0.034 ± 0.029 <sup>b</sup>  | 0.014   |
|          | Bdellovibrionota | <i>Bdellovibrio</i>                    | NI <sup>b</sup>             | NI <sup>b</sup>             | 0.000 ± 0.003 <sup>a</sup>  | 0.037   |
|          | Chloroflexi      | <i>Gitt.GS.136</i>                     | NI <sup>b</sup>             | 0.004 ± 0.014 <sup>a</sup>  | NI <sup>b</sup>             | 0.058   |
|          |                  | <i>Uncultured</i>                      | NI <sup>b</sup>             | NI <sup>b</sup>             | 0.000 ± 0.005 <sup>a</sup>  | 0.039   |
|          | Desulfobacterot  | <i>Desulfuromonas</i>                  | NI <sup>b</sup>             | 0.000 ± 0.002 <sup>a</sup>  | NI <sup>b</sup>             | 0.039   |
|          |                  | <i>Desulfobulbus</i>                   | NI <sup>b</sup>             | 0.000 ± 0.006 <sup>a</sup>  | NI <sup>b</sup>             | 0.039   |
|          | Elusimicrobiota  | <i>Endomicrobium</i>                   | 0.005 ± 0.005 <sup>a</sup>  | 0.000 ± 0.005 <sup>b</sup>  | 0.007 ± 0.001 <sup>ab</sup> | 0.095   |
|          | Fibrobacterota   | <i>Fibrobacter</i>                     | 0.943 ± 0.262 <sup>a</sup>  | 0.631 ± 0.172 <sup>b</sup>  | 0.655 ± 0.201 <sup>b</sup>  | 0.013   |
|          | Firmicutes       | <i>Allobaculum</i>                     | NI <sup>b</sup>             | NI <sup>b</sup>             | 0.013 ± 0.066 <sup>a</sup>  | 0.040   |
|          |                  | <i>Anaerovorax</i>                     | 0.266 ± 0.071 <sup>b</sup>  | 0.335 ± 0.032 <sup>a</sup>  | 0.266 ± 0.055 <sup>b</sup>  | 0.017   |
|          |                  | <i>Bacteroides_pectinophilus_group</i> | NI <sup>b</sup>             | 0.000 ± 0.011 <sup>ab</sup> | 0.013 ± 0.014 <sup>a</sup>  | 0.049   |
|          |                  | <i>Clostridia_vadinBB60_group</i>      | 0.007 ± 0.017 <sup>b</sup>  | 0.027 ± 0.005 <sup>a</sup>  | 0.021 ± 0.018 <sup>ab</sup> | 0.054   |
|          |                  | <i>Uncultured</i>                      | 0.030 ± 0.012 <sup>ab</sup> | 0.035 ± 0.011 <sup>a</sup>  | 0.019 ± 0.007 <sup>b</sup>  | 0.036   |
|          |                  | <i>Eubacterium</i>                     | NI <sup>b</sup>             | 0.003 ± 0.005 <sup>a</sup>  | NI <sup>ab</sup>            | 0.070   |
|          |                  | <i>Flavonifractor</i>                  | NI <sup>b</sup>             | 0.000 ± 0.001 <sup>a</sup>  | NI <sup>b</sup>             | 0.076   |
|          |                  | <i>Howardella</i>                      | NI <sup>b</sup>             | 0.006 ± 0.017 <sup>a</sup>  | NI <sup>ab</sup>            | 0.067   |
|          |                  | <i>Lachnospiraceae_NK3A20_group</i>    | 0.921 ± 0.377 <sup>ab</sup> | 0.834 ± 0.287 <sup>a</sup>  | 0.611 ± 0.207 <sup>b</sup>  | 0.078   |
|          |                  | <i>Lachnospiraceae_NK4B4_group</i>     | 0.021 ± 0.009 <sup>ab</sup> | 0.009 ± 0.012 <sup>b</sup>  | 0.016 ± 0.008 <sup>a</sup>  | 0.079   |
|          |                  | <i>Lachnospiraceae_XPB1014_group</i>   | 0.893 ± 0.214 <sup>ab</sup> | 1.002 ± 0.273 <sup>a</sup>  | 0.817 ± 0.237 <sup>b</sup>  | 0.088   |
|          |                  | <i>Lysinibacillus</i>                  | NI <sup>b</sup>             | 0.013 ± 0.021 <sup>a</sup>  | 0.012 ± 0.016 <sup>a</sup>  | 0.030   |
|          |                  | <i>Peptoclostridium</i>                | NI <sup>b</sup>             | 0.007 ± 0.603 <sup>ab</sup> | 0.536 ± 1.006 <sup>a</sup>  | 0.037   |

|         |                   |                                                           |                            |                             |                             |       |
|---------|-------------------|-----------------------------------------------------------|----------------------------|-----------------------------|-----------------------------|-------|
|         |                   | <i>Peptococcus</i>                                        | NI <sup>b</sup>            | NI <sup>b</sup>             | 0.000 ± 0.015 <sup>a</sup>  | 0.039 |
|         |                   | <i>Staphylococcus</i>                                     | NI <sup>b</sup>            | NI <sup>ab</sup>            | 0.004 ± 0.009 <sup>a</sup>  | 0.021 |
|         |                   | <i>Weissella</i>                                          | NI <sup>b</sup>            | NI <sup>b</sup>             | 0.004 ± 0.013 <sup>a</sup>  | 0.026 |
|         | Myxococcota       | <i>P3OB.42</i>                                            | 0.003 ± 0.003 <sup>a</sup> | NI <sup>b</sup>             | 0.003 ± 0.003 <sup>ab</sup> | 0.097 |
|         | Planctomycetota   | <i>vadinHA49</i>                                          | NI <sup>ab</sup>           | NI <sup>b</sup>             | 0.000 ± 0.005 <sup>a</sup>  | 0.092 |
|         | Proteobacteria    | <i>Allorhizobium.Neorhizobium.Pararhizobium.Rhizobium</i> | 0.012 ± 0.014 <sup>b</sup> | 0.048 ± 0.036 <sup>a</sup>  | 0.091 ± 0.083 <sup>a</sup>  | 0.001 |
|         |                   | <i>1174.901.12</i>                                        | NI <sup>b</sup>            | NI <sup>b</sup>             | 0.000 ± 0.013 <sup>a</sup>  | 0.011 |
|         |                   | <i>Belnapia</i>                                           | NI <sup>b</sup>            | NI <sup>b</sup>             | 0.000 ± 0.001 <sup>a</sup>  | 0.039 |
|         |                   | <i>Caulobacter</i>                                        | NI <sup>ab</sup>           | 0.000 ± 0.005 <sup>a</sup>  | NI <sup>b</sup>             | 0.092 |
|         |                   | <i>Comamonas</i>                                          | 0.004 ± 0.010 <sup>b</sup> | 0.002 ± 0.010 <sup>b</sup>  | 0.012 ± 0.013 <sup>a</sup>  | 0.065 |
|         |                   | <i>Devosia</i>                                            | 0.000 ± 0.002 <sup>b</sup> | 0.014 ± 0.043 <sup>ab</sup> | 0.022 ± 0.035 <sup>a</sup>  | 0.040 |
|         |                   | <i>Hyphomicrobium</i>                                     | NI <sup>b</sup>            | 0.000 ± 0.006 <sup>ab</sup> | 0.000 ± 0.009 <sup>a</sup>  | 0.070 |
|         |                   | <i>Massilia</i>                                           | 0.007 ± 0.024 <sup>b</sup> | 0.010 ± 0.038 <sup>b</sup>  | 0.047 ± 0.083 <sup>a</sup>  | 0.019 |
|         |                   | <i>Pseudomonas</i>                                        | 0.033 ± 0.153 <sup>b</sup> | 0.189 ± 0.173 <sup>ab</sup> | 0.206 ± 0.089 <sup>a</sup>  | 0.055 |
|         |                   | <i>Uncultured</i>                                         | NI <sup>b</sup>            | NI <sup>ab</sup>            | 0.000 ± 0.007 <sup>a</sup>  | 0.088 |
|         |                   | <i>Uncultured</i>                                         | 0.021 ± 0.019 <sup>b</sup> | 0.023 ± 0.005 <sup>a</sup>  | 0.013 ± 0.014 <sup>a</sup>  | 0.027 |
|         |                   | <i>Rubellimicrobium</i>                                   | NI <sup>b</sup>            | NI <sup>b</sup>             | 0.000 ± 0.062 <sup>a</sup>  | 0.039 |
|         | Spirochaetota     | <i>Treponema</i>                                          | 1.015 ± 0.285 <sup>a</sup> | 0.735 ± 0.431 <sup>ab</sup> | 0.729 ± 0.317 <sup>b</sup>  | 0.061 |
|         | Verrucomicrobiota | <i>ADurb.Bin063.1</i>                                     | 0.000 ± 0.004 <sup>a</sup> | NI <sup>ab</sup>            | NI <sup>b</sup>             | 0.091 |
| Archaea | Halobacterota     | <i>Methanomicrobium</i>                                   | 1.521 ± 1.116 <sup>b</sup> | 2.206 ± 0.412 <sup>ab</sup> | 2.648 ± 0.909 <sup>a</sup>  | 0.037 |

NI: not identified. SEM: Standard error means. CONT: conventional urea; PRU: post-ruminal urea; U+PRU: conventional urea+ post-ruminal urea. Values followed by superscript letters indicate statistical differences (P < 0.05) based on Kruskal-Wallis test.
